# Supplementary material for: PEDOT:PSS monolayers to enhance the hole extraction and stability of perovskite solar cells
Source: Royal Society of Chemistry journal article supplement (doi:10.1039/c8ta05234d), 2018-01-01
Supplement: c8ta05234d1.pdf [file c8ta05234d1.pdf]

## **PEDOT:PSS Monolayers to Enhance Hole Extraction and Stability of Perovskite Solar Cells**

Lijun Hu<sup>a</sup>, Meng Li<sup>a\*</sup>, Ke Yang<sup>a</sup>, Zhuang Xiong<sup>a</sup>, Bo Yang<sup>b</sup>, Ming Wang<sup>b</sup>, Xiaosheng Tang<sup>b</sup>,  
Zhigang Zang<sup>b</sup>, Xixia Liu<sup>c</sup>, Bichen Li<sup>c</sup>, Zeyun Xiao<sup>d</sup>, Shirong Lu<sup>d</sup>, Hao Gong<sup>c</sup>, Jianyong Ouyang<sup>c</sup>,  
Kuan Sun<sup>a\*</sup>

<sup>a</sup> Key Laboratory of Low-grade Energy Utilization Technologies and Systems, Ministry of Education, School of Power Engineering, Chongqing University, Chongqing 400044, China

<sup>b</sup> Key Laboratory of Optoelectronic Technology & Systems, Ministry of Education, Chongqing 400044, China

<sup>c</sup> Department of Materials Science & Engineering, National University of Singapore, Singapore 117574, Singapore

<sup>d</sup> Chongqing Institute of Green and Intelligent Technology, CAS, 266 Fang Zheng Road, Chongqing 400714, China

Corresponding Emails: kuan.sun@cqu.edu.cn; limeng@cqu.edu.cn

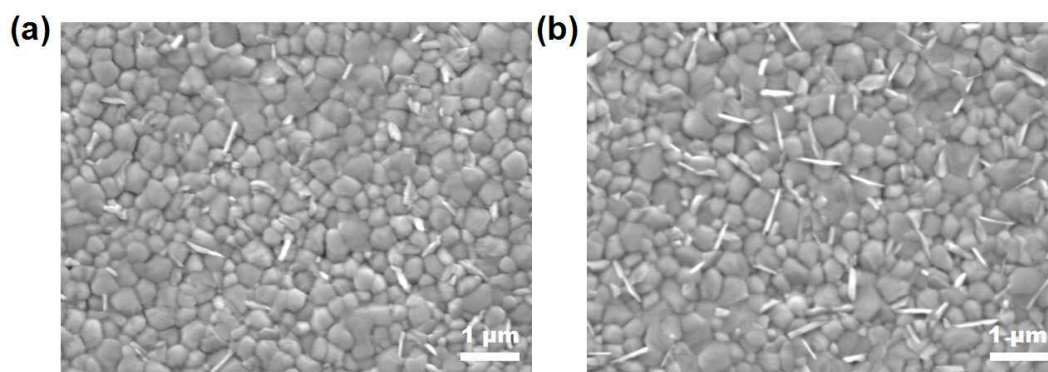

**Figure S1.** Perovskite films morphology prepared on pristine PEDOT:PSS (a) and (b) water rinsed monolayers PEDOT:PSS.

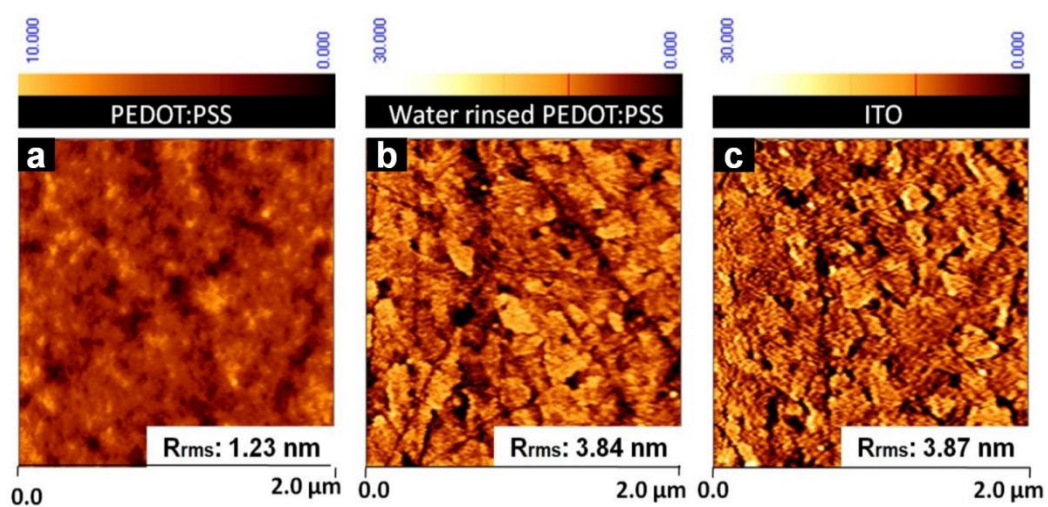

**Figure S2.** AFM images: (a) pristine PEDOT:PSS, (b) water rinsed PEDOT:PSS and (c) ITO.
